# Supplementary material
Source: HighWire-hosted journal article supplement (https://bmjopenquality.bmj.com/highwire/filestream/147597/field_highwire_adjunct_files/0/bmjqs-2012-001747supp.pdf)

Supplementary Figure 2: Process mapping for problem analysis during PDSA cycles #2 and #3

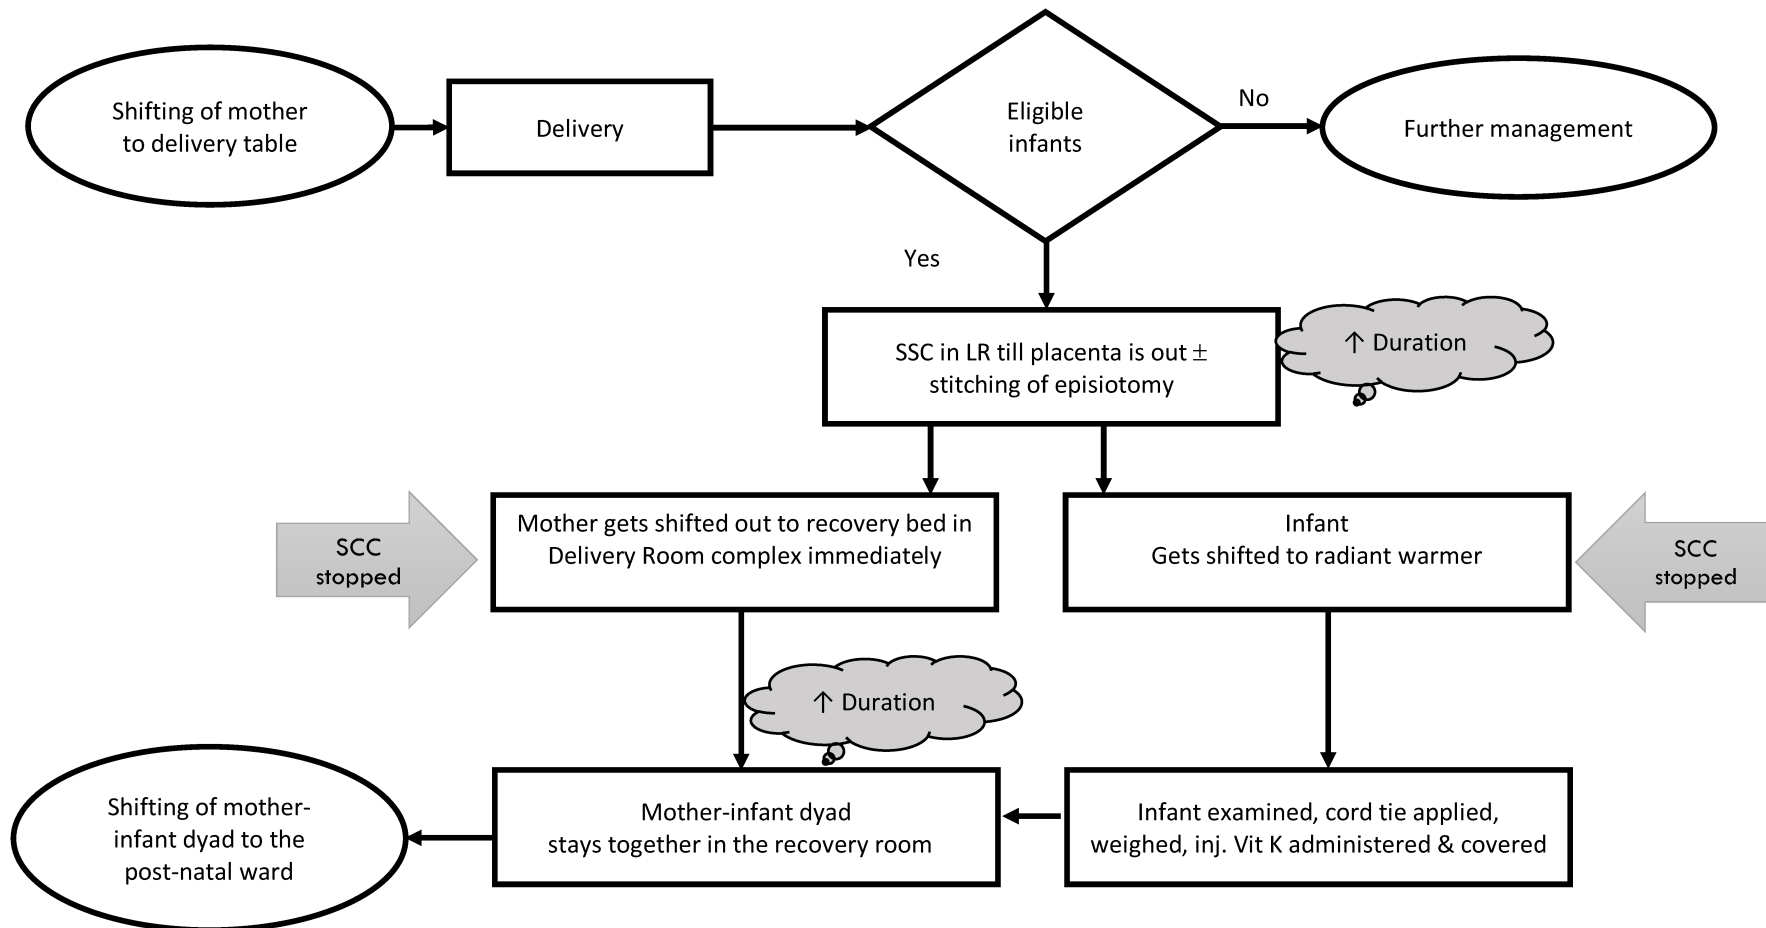

Supplement: bmjqs-2012-001747supp.pdf [file bmjqs-2012-001747supp.pdf]
